# Supplementary material
Source: publisher figshare collection journal article supplement (https://tandf.figshare.com/articles/dataset/_/9307814)
Supplement: Supplementary file 1 [file 2]

Visual exploration of each explanatory variable against the dependent variable

#1 – Depth

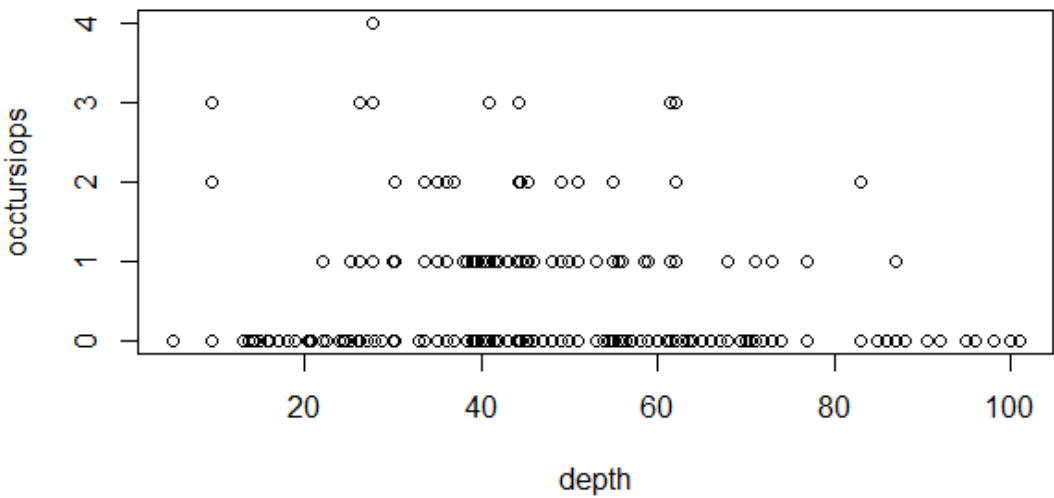

Linear relationship

#2 – Distance to coast

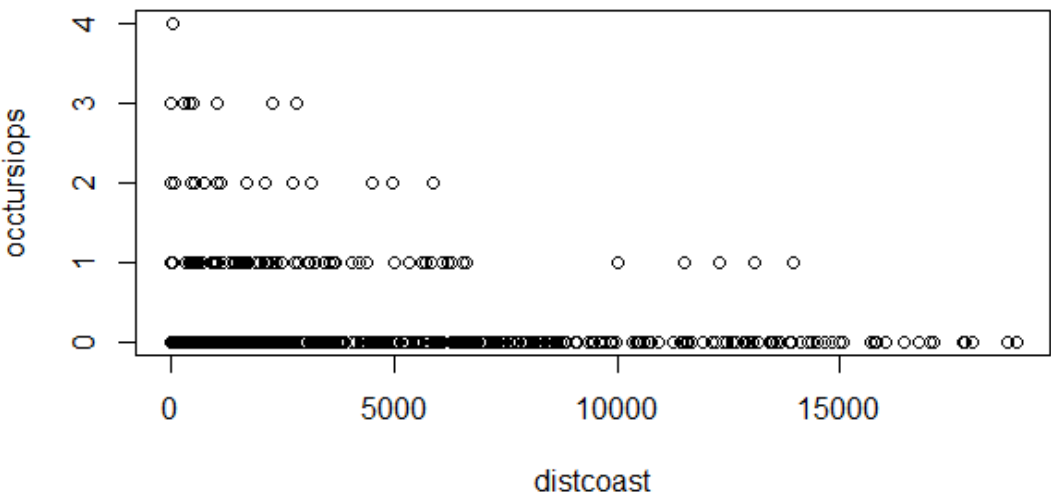

Linear relationship

### #3 – Sea Surface Temperature Standard Deviation

Linear relationship

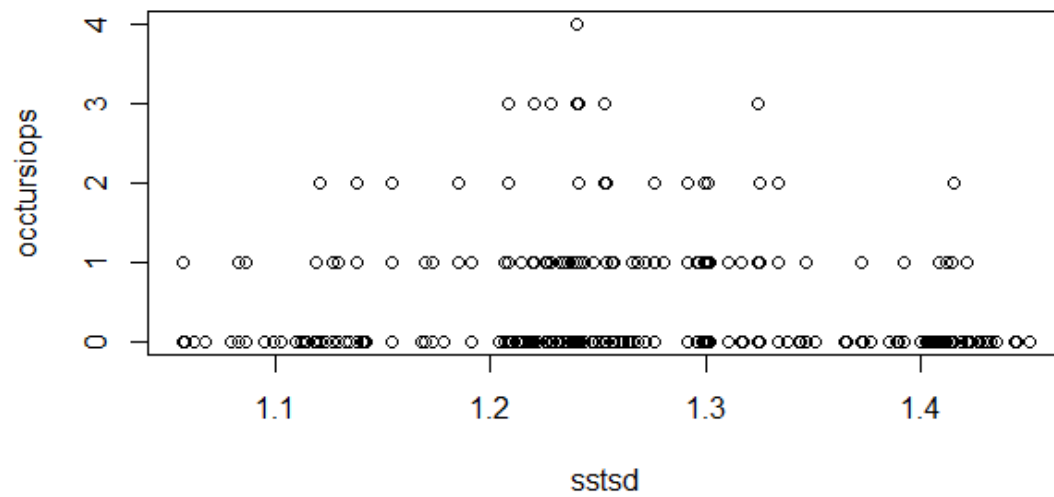

### #4 - Mean Sea Surface Temperature

Linear relationship

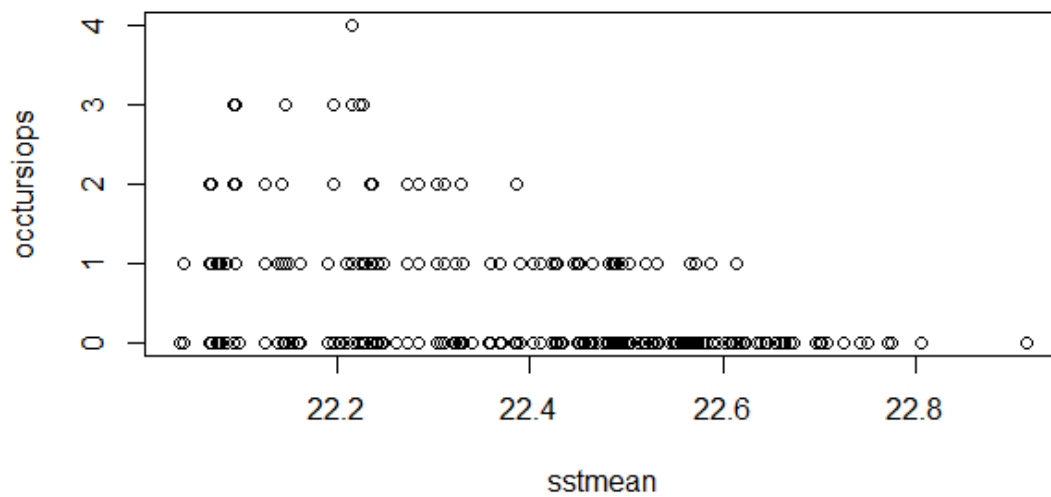

#### #5 – Minimum Sea Surface Temperature

Curvilinear relationship

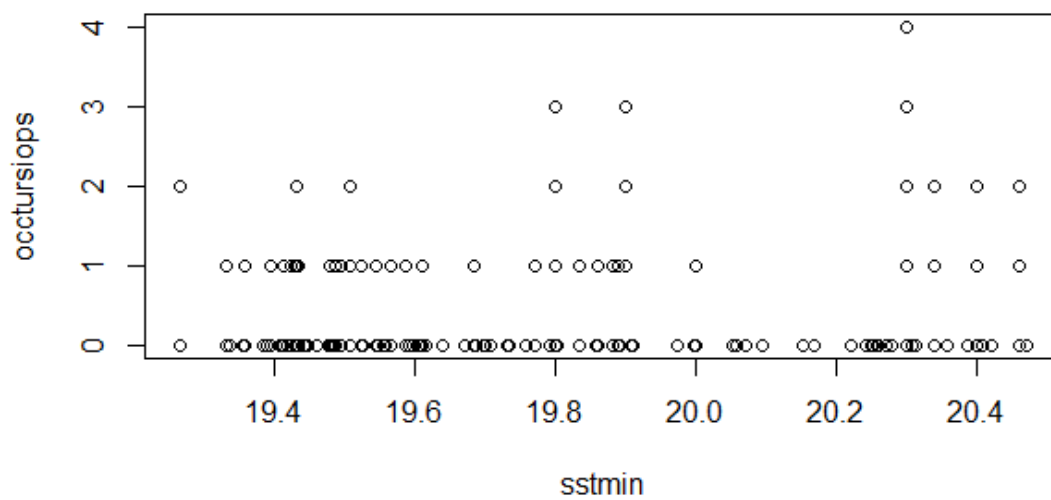

#### #6 – Maximum Sea Surface Temperature

Linear relationship

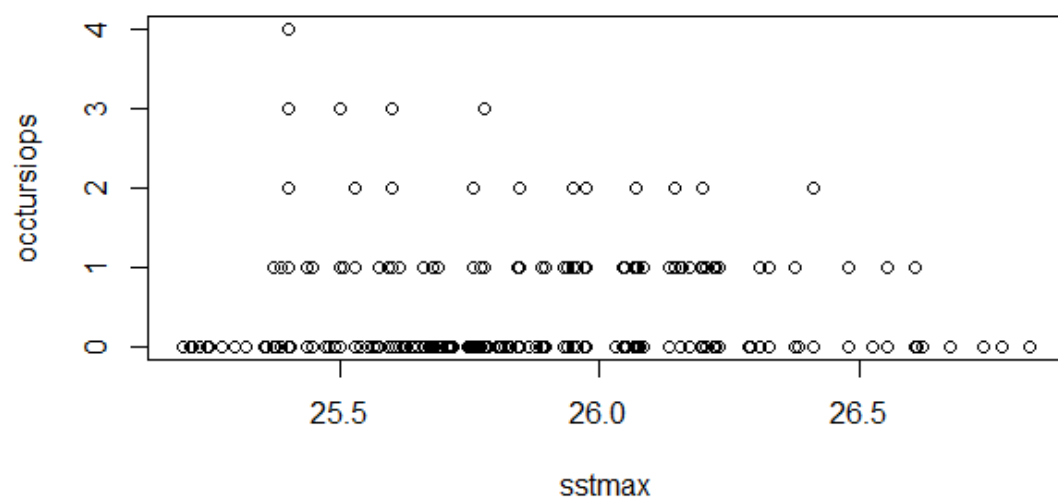

### #7 – Mean chlorophyll-a concentration

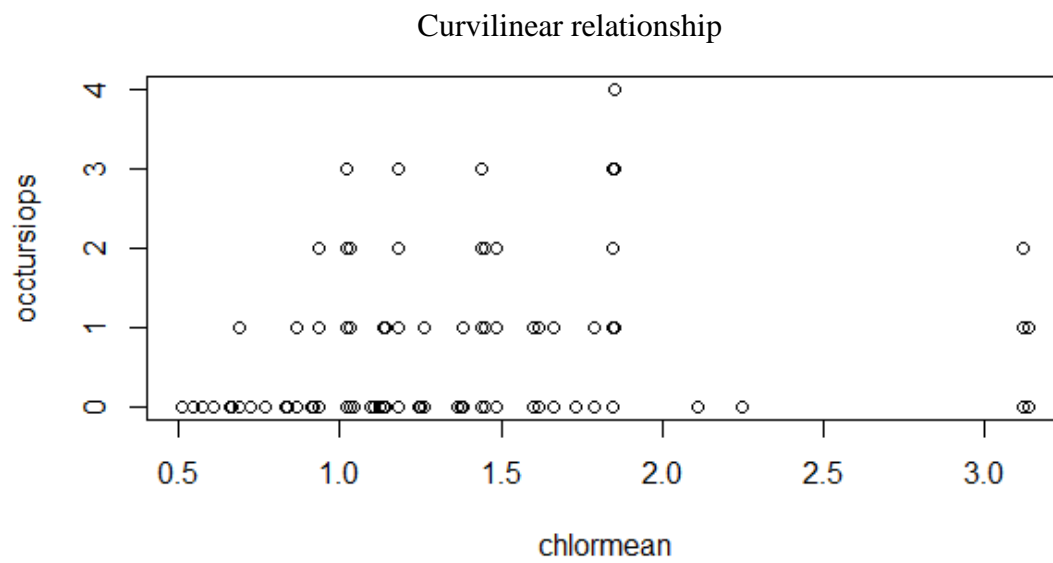

### #8 – Minimum chlorophyll-a concentration

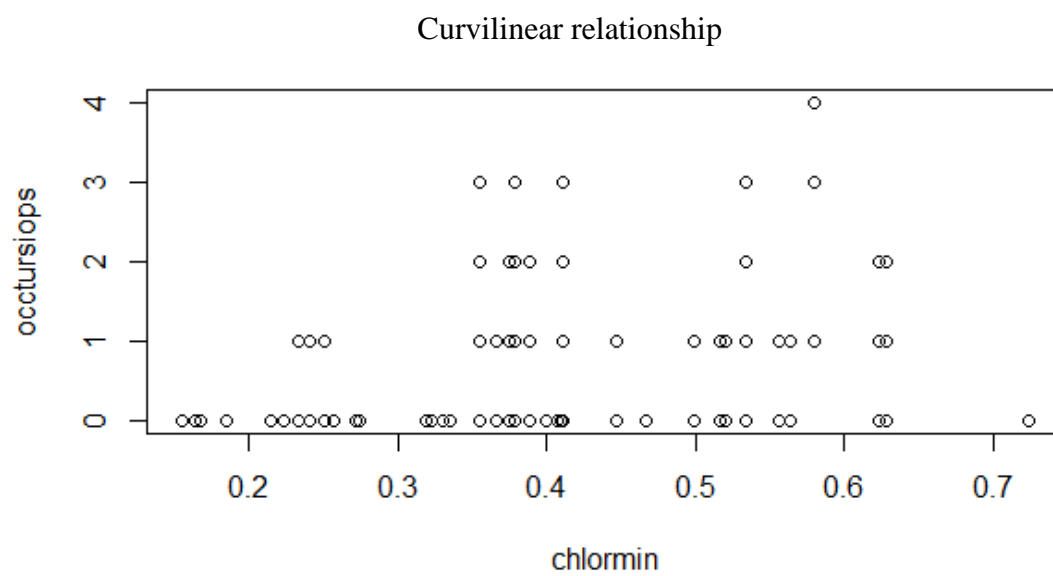

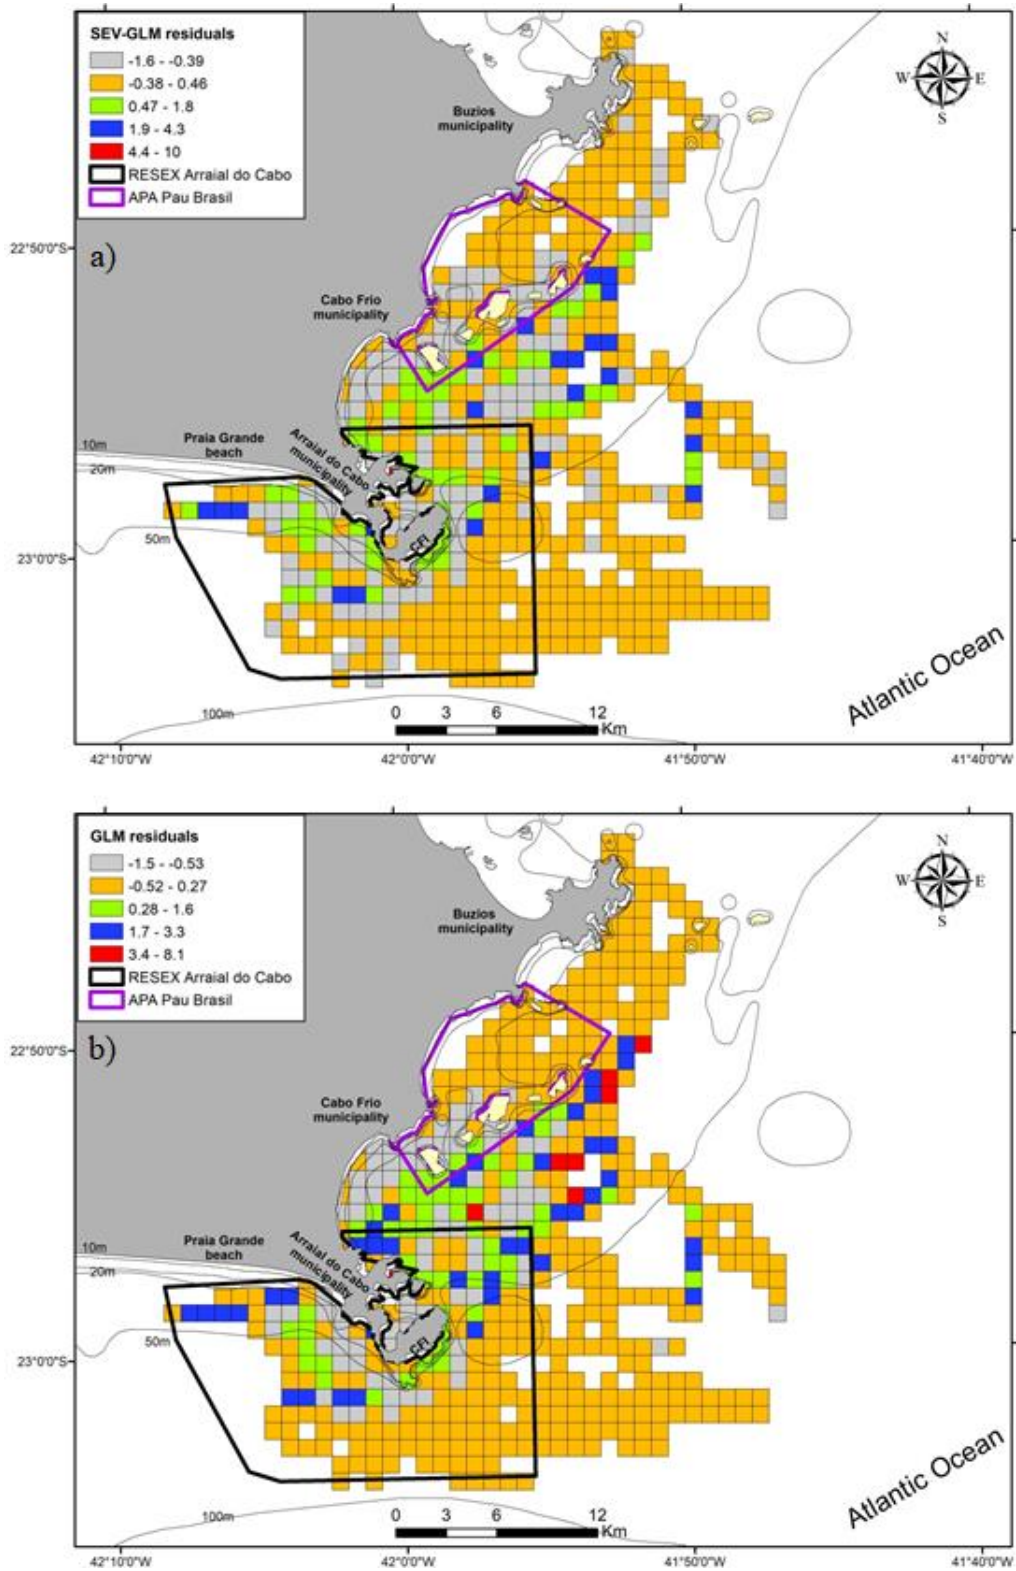

Supp. Fig. 1. Model residuals for each grid cell from Poisson generalized linear models (a) with and (b) without spatial eigenvectors, for Bottlenose dolphins along the Cabo Frio Coast, Rio de Janeiro, Brazil, CFI: Cabo Frio Island.

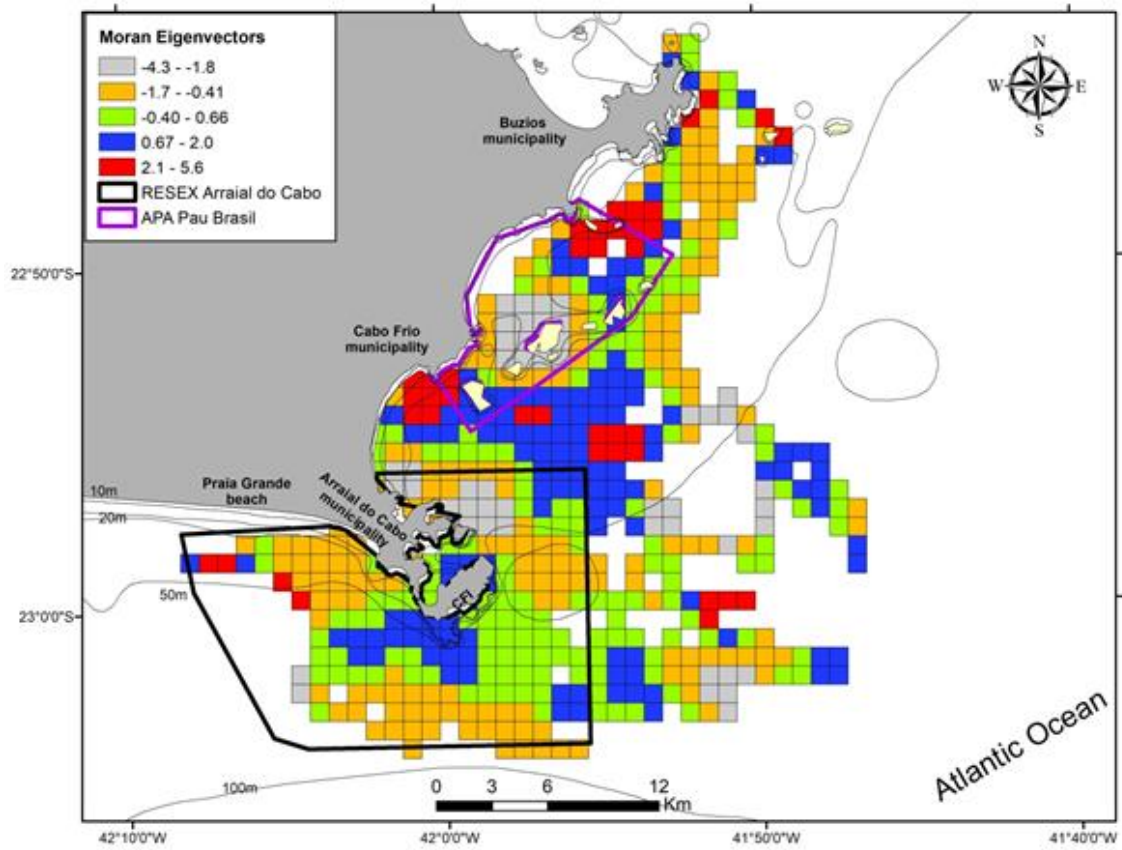

Supp. Fig. 2. Linear combination for the seven Moran eigenvectors with estimated coefficient values retained at the best Spatial Eigenvector Generalized Linear Model for *Tursiops truncatus* in Cabo Frio, RJ, Brazil.
